# Supplementary material for: m6A-related lncRNAs are potential biomarkers for predicting prognoses and immune responses in patients with LUAD
Source: PubMed Central journal article supplement — Mol Ther Nucleic Acids. 2021 Apr 9;24:780–91. doi: 10.1016/j.omtn.2021.04.003 (PMC8094594; doi:10.1016/j.omtn.2021.04.003), 2021-04-09
Supplement: mmc1.pdf [file mmc1.pdf]

OMTN, Volume 24

## **Supplemental information**

**m<sup>6</sup>A-related lncRNAs are potential  
biomarkers for predicting prognoses and  
immune responses in patients with LUAD**

**Feng Xu, Xiaoling Huang, Yangyi Li, Yongsong Chen, and Ling Lin**

**Figure S1**

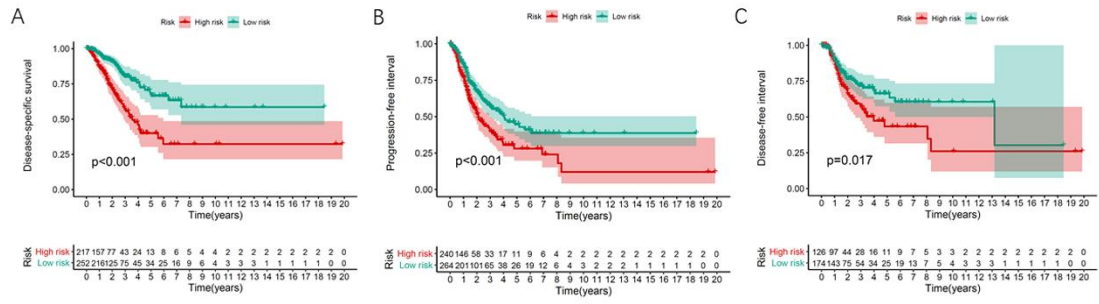

**Figure S1. (A-C)** Kaplan-Meier survival curves of the relative DSS, PFI, and DFI between the high- and low-risk groups.

**Figure S2**

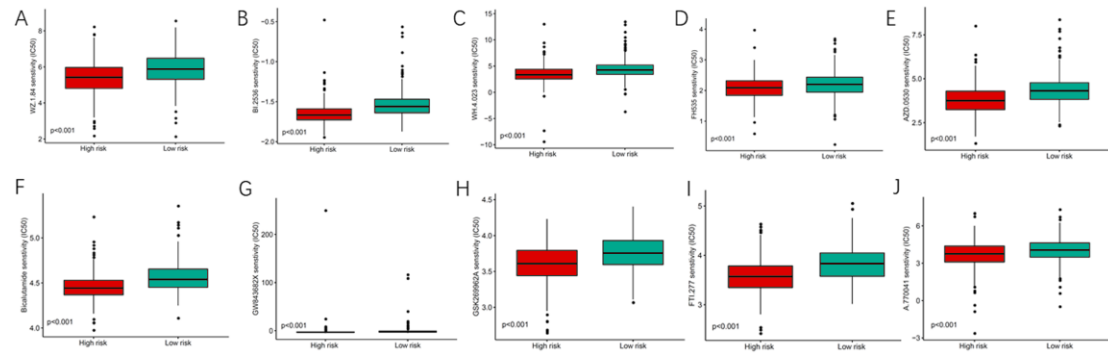

**Figure S2. (A-J)** Identification of novel candidate compounds targeting the m6A-related lncRNA model

**Table S1. Summary of patients' characteristics**

| Characteristics | Entire set |            | Training set |            | Testing set |            | p-Value |
|-----------------|------------|------------|--------------|------------|-------------|------------|---------|
|                 | Number     | Percentage | Number       | Percentage | Number      | Percentage |         |
| Age             |            |            |              |            |             |            |         |
| <60 year        | 136        | 26.98      | 89           | 29.28%     | 47          | 23.5       | 0.2025  |
| ≥60 year        | 358        | 71.03      | 210          | 69.08      | 148         | 74         |         |
| Not available   | 10         | 1.98       | 5            | 1.64       | 5           | 2.5        |         |
| Gender          |            |            |              |            |             |            |         |
| Female          | 270        | 53.57      | 165          | 54.28      | 105         | 52.5       | 0.7642  |
| Male            | 234        | 46.43      | 139          | 45.72      | 95          | 47.5       |         |
| Stage           |            |            |              |            |             |            |         |
| Stage I-II      | 389        | 77.18      | 236          | 77.63      | 153         | 76.5       | 0.8231  |
| Stage III-IV    | 107        | 21.23      | 63           | 20.72      | 44          | 22         |         |
| Not available   | 8          | 1.59       | 5            | 1.64       | 3           | 1.5        |         |
| T               |            |            |              |            |             |            |         |
| T1-2            | 437        | 86.71      | 269          | 88.49      | 168         | 84         | 0.1648  |
| T3-4            | 64         | 12.7       | 33           | 10.86      | 31          | 15.5       |         |
| Not available   | 3          | 0.6        | 2            | 0.66       | 1           | 0.5        |         |
| M               |            |            |              |            |             |            |         |
| M0              | 335        | 66.47      | 203          | 66.78      | 132         | 66         | 0.8093  |
| M1              | 25         | 4.96       | 14           | 4.61       | 11          | 5.5        |         |
| Not available   | 144        | 28.57      | 87           | 28.62      | 57          | 28.5       |         |
| N               |            |            |              |            |             |            |         |
| N0              | 325        | 64.48      | 197          | 64.8       | 128         | 64         | 0.9517  |
| N1-3            | 167        | 33.13      | 100          | 32.89      | 67          | 33.5       |         |
| Not available   | 12         | 2.38       | 7            | 2.3        | 5           | 2.5        |         |
